# Supplementary material for: Improved reweighting protocols for variationally enhanced sampling simulations with multiple walkers
Source: Royal Society of Chemistry journal article supplement (doi:10.1039/d2cp04009c), 2023-01-01
Supplement: d2cp04009c1.pdf [file d2cp04009c1.pdf]

# Electronic Supplementary Information for Improved Reweighting Protocols for Variationally Enhanced Sampling Simulations with Multiple Walkers

Baltzar Stevansson\*, and Mattias Edén\*

Department of Materials and Environmental Chemistry, Stockholm University,  
SE-106 91 Stockholm, Sweden.

\*Corresponding authors. E-mail: *baltzar.stevansson@mmk.su.se*; *mattias.eden@mmk.su.se*

## Contents

1. **Table S1.** Computational Reweighting Demands.
2. **Figure S1.** Alanine Dipeptide: Convergence Data Spread for  $s = \phi$ .
3. **Figure S2.** Alanine Dipeptide: Convergence Data Spread for  $s = \psi$ .
4. **Figure S3.** Analytical Potential Model: Convergence Data Spread.
5. **Figure S4.** Analytical Potential Model: Convergence using  $t_{\min} = 100$  ps.

**Table S1.** Computational Efforts for Reweighting.<sup>a</sup>

| Simulation time                                   | $\mathcal{T} =$                                                      | 90 ps   | 900 ps | 9000 ps |
|---------------------------------------------------|----------------------------------------------------------------------|---------|--------|---------|
| Number of time points                             | $N_{\mathcal{T}} =$                                                  | 100     | 1000   | 10000   |
| $M_{\Sigma}^t, M_w^t$                             | $N_{\text{F}}N_{\mathcal{T}}(N_{\mathcal{T}} + 1)N_W/2$              | 0.012 s | 1.2 s  | 120 s   |
| $M_{\Sigma}^{\mathcal{T}}, M_w^{\mathcal{T}}$     | $N_{\text{F}}N_{\mathcal{T}}(N_{\mathcal{T}} + 1)N_WN_{\text{iter}}$ | 0.23 s  | 23 s   | 2300 s  |
| $M_{\Sigma}^{\text{TP}}, M_{\Sigma}^{\text{VES}}$ | $N_{\text{F}}N_{\mathcal{T}}N_s$                                     | 0.056 s | 0.56 s | 5.6 s   |

<sup>a</sup> Number of floating-point operations ( $N_{\text{op}}$ ) associated with each reweighting protocol along with the CPU times required for the reweighting results of Fig. 3a with  $N_W = 4$ . Here,  $N_{\text{F}} = 12$  is the number of Fourier coefficients [eqn (14)],  $N_{\text{iter}} = 10$  is the number of iterations to solve eqn (22), and  $N_s = 1000$  is the total number of collective-variable samples/coordinates. The  $M_{\Sigma}^{\mathcal{T}}$  and  $M_w^{\mathcal{T}}$  methods are not suitable for "on-the-fly" calculations because they require consecutive re-evaluations of  $c(t)$  at all time points  $t \leq \mathcal{T}$  for each additional sampled time point, whereas the  $M_{\Sigma}^t, M_w^t, M_{\Sigma}^{\text{TP}},$  and  $M_{\Sigma}^{\text{VES}}$  methods require only  $N_{\text{op}}/N_{\mathcal{T}}$  operations. The CPU time periods required to calculate  $c(t)$  (rightmost columns) in serial mode were obtained on an Intel<sup>®</sup> Core<sup>™</sup> i7-9700K CPU (3.60 GHz) desktop computer running Linux Ubuntu (version 18.04) and compiled using GNU Fortran (version 7.5.0) with optimization and double precision.

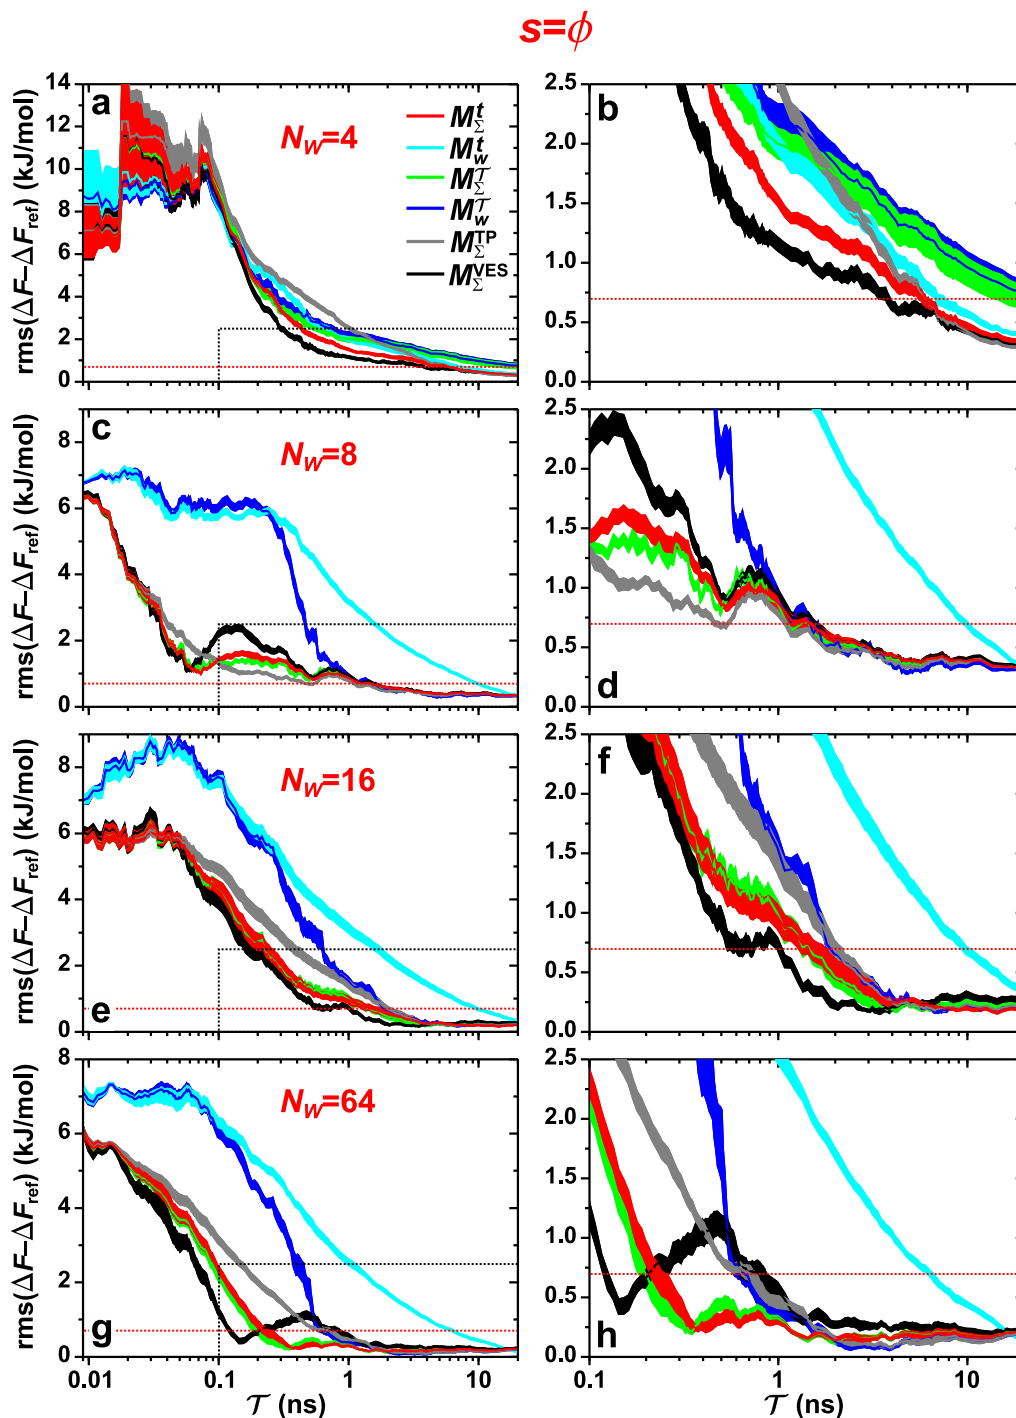

**Fig. S1.** Convergence curves for  $s = \phi$  as in Fig. 3 (left panel) and the zoomed counterparts of Fig. 4 (right panel) but plotting the  $\text{rms}(\Delta F - \Delta F_{\text{ref}})$  results along with the  $\pm\sigma$  spread among the (a–d) 16, (e, f) 8 and (g, h) 6 independent simulations for each as-indicated reweighting and walker ensemble.

$s = \psi$ 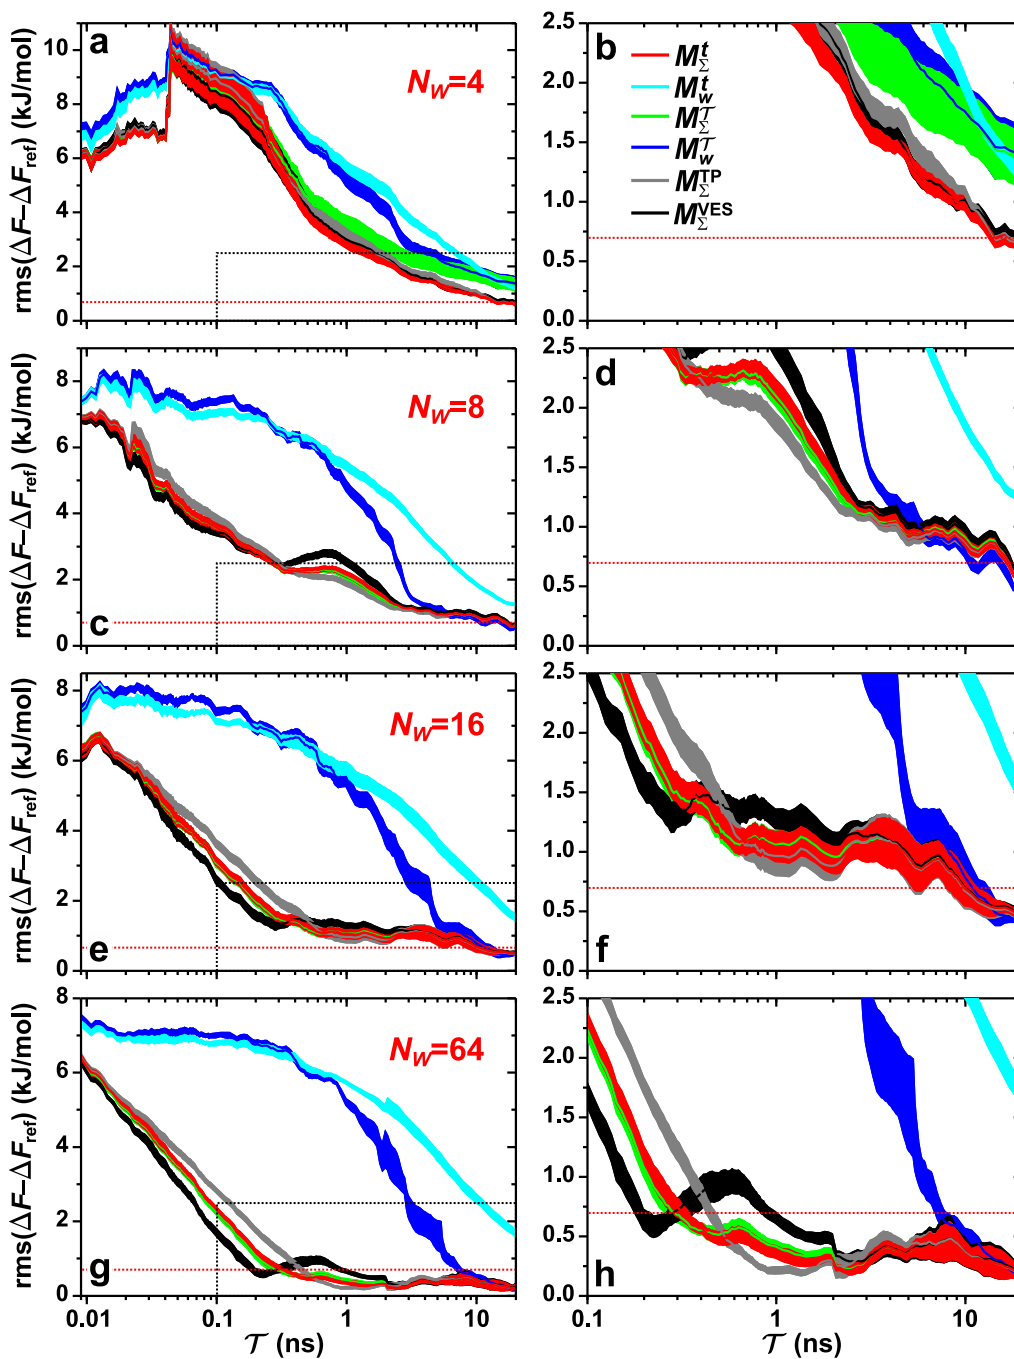

**Fig. S2.** Convergence curves for  $s = \psi$  as in Fig. 3 (left panel) and the zoomed counterparts of Fig. 4 (right panel) but plotting the  $\text{rms}(\Delta F - \Delta F_{\text{ref}})$  results along with the  $\pm\sigma$  spread among the (a–d) 16, (e, f) 8 and (g, h) 6 independent simulations for each as-indicated reweighting and walker ensemble.

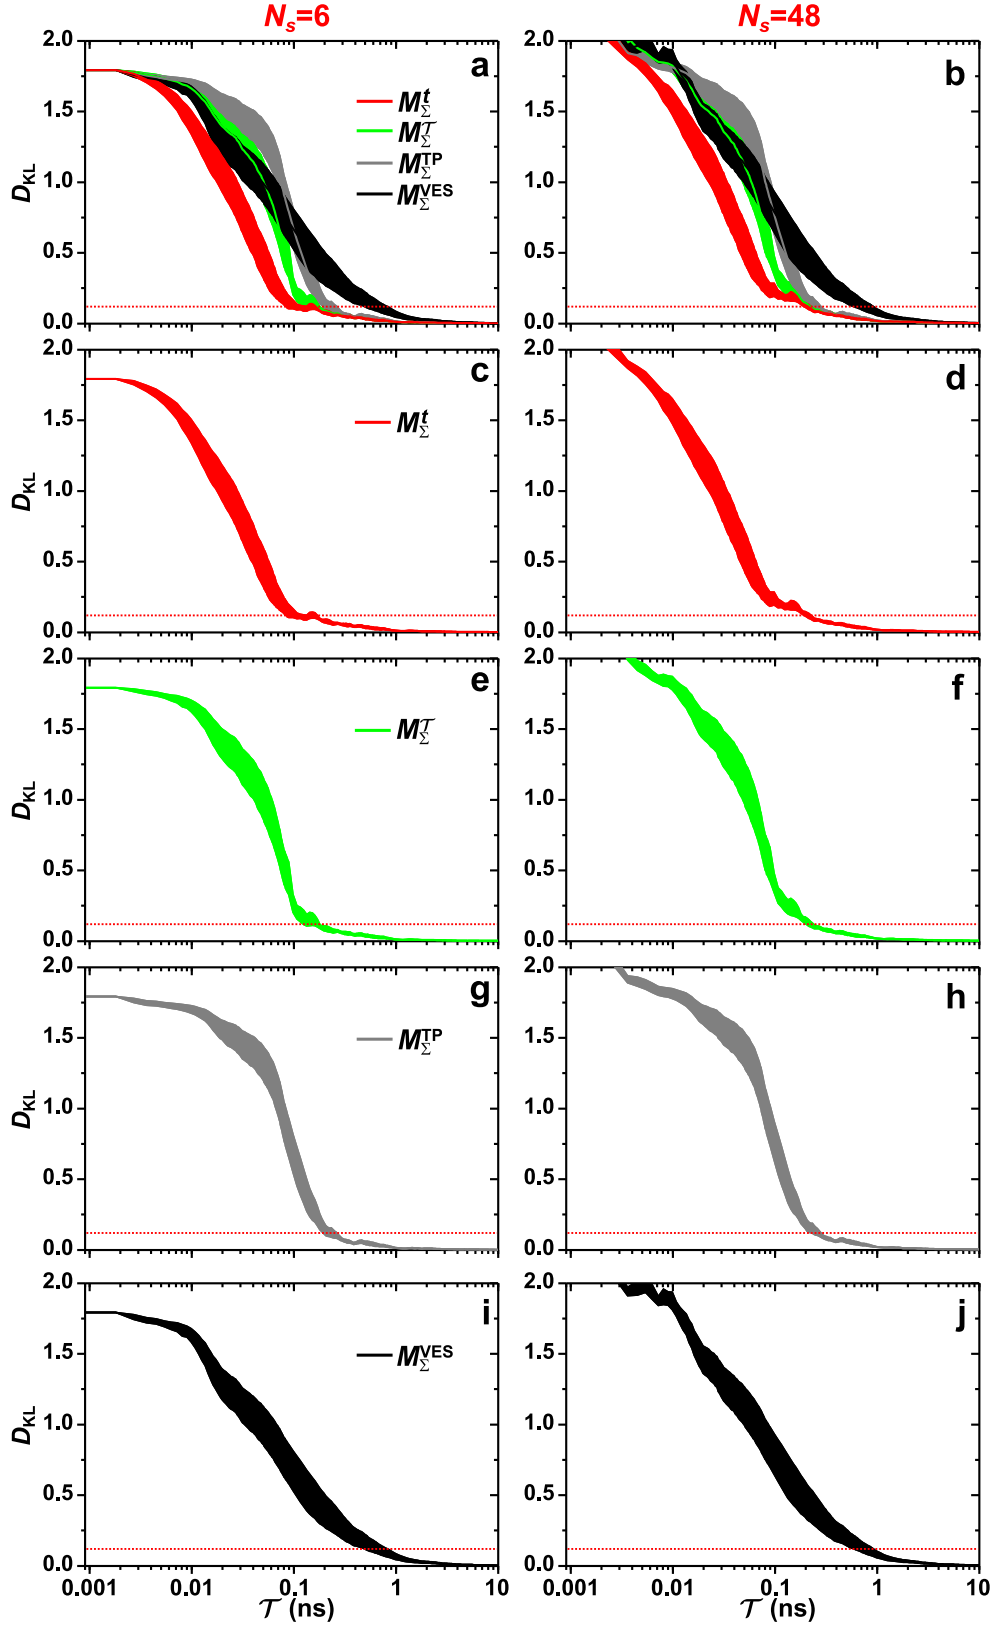

**Fig. S3.** (a, b)  $D_{\text{KL}}(\mathcal{T})$  convergence plots as in Fig. 6b,c but also including the  $\pm\sigma$  data variabilities among 32 independent simulations for each reweighting protocol for  $N_s = 6$  (left panel) and  $N_s = 48$  (right panel). (c-j) The result from each as-indicated reweighting method plotted separately.

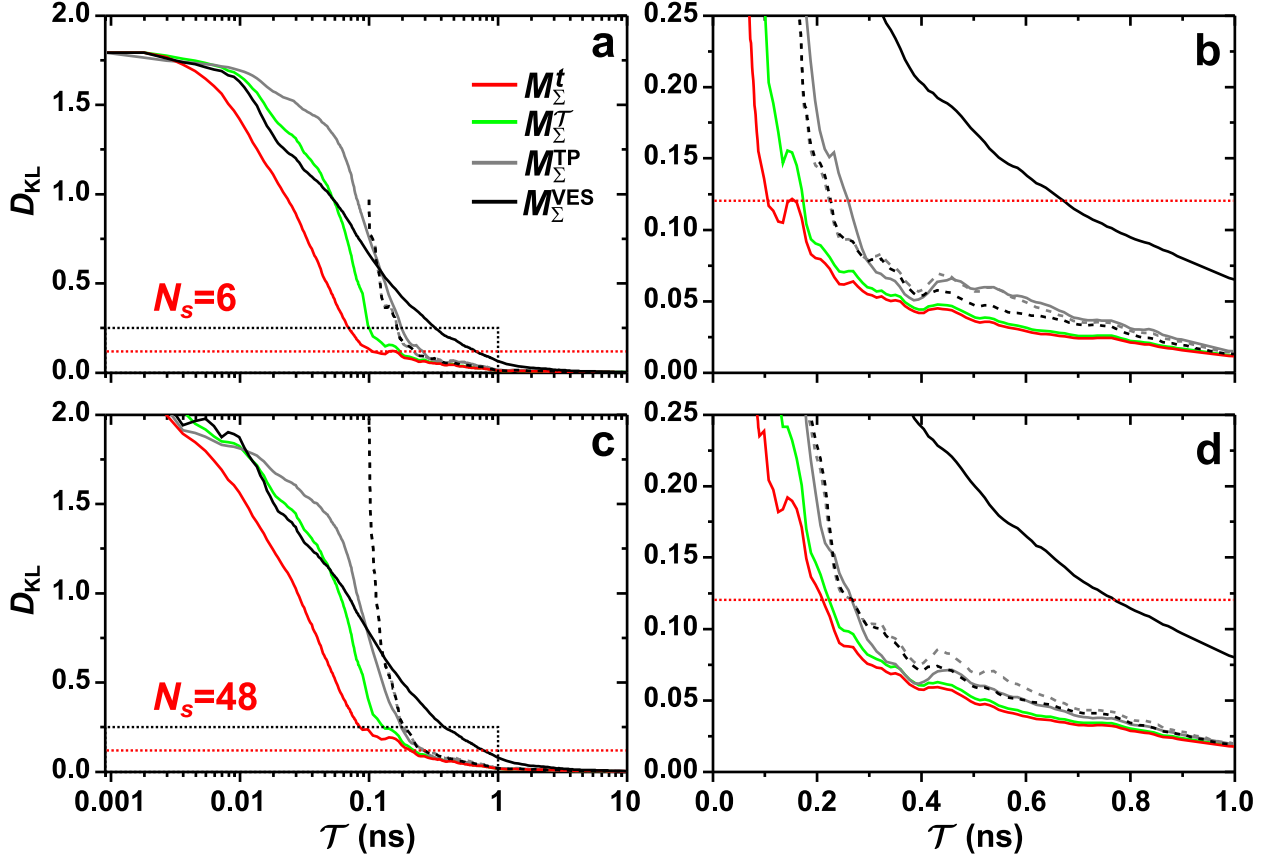

**Fig. S4.** (a, c)  $D_{\text{KL}}(\mathcal{T})$  convergence plots as in Fig. 6b,c for (a)  $N_s = 6$  and (c)  $N_s = 48$  bins [eqn. (35)] but additionally including the results after excluding all data with  $t < t_{\text{min}} = 100$  ps for the  $M_{\Sigma}^{\text{TP}}$  and  $M_{\Sigma}^{\text{VES}}$  schemes in the reweighting, shown by dashed grey and black curves, respectively. (b, d) Zooms around the near-convergence region, i.e., the black dotted rectangles in (a, c). The value  $t_{\text{min}} = 100$  ps ensured optimal reweighting performance of both CV-integration-based  $M_{\Sigma}^{\text{VES}}$  and  $M_{\Sigma}^{\text{TP}}$  methods, after which they essentially indistinguishable convergence curves for simulation periods  $\mathcal{T} \lesssim 400$  ps, and requiring  $\mathcal{T} = 230$  ps ( $N_s = 6$ ) and  $\mathcal{T} = 270$  ps ( $N_s = 48$ ) to reach convergence.
